# Supplementary material for: Three-Body Excitations in Fock-Space Coupled-Cluster: Fourth Order Perturbation Correction to Electron Affinity and Its Relation to Bondonic Formalism
Source: MDPI journal article supplement (doi:10.3390/ijms22168953), 2021-08-19
Supplement: s1 [file s1]

## Supplementary Information (SI-1)

# Three-Body Excitations in Fock-Space Coupled-Cluster: Fourth Order Perturbation Correction to Electron Affinity and Its Relation to Bondonic Formalism

Suhita Basumallick <sup>1</sup>, Mihai V. Putz <sup>2,\*</sup> and Sourav Pal <sup>1,3,\*</sup>

<sup>1</sup> Department of Chemistry, Indian Institute of Technology Bombay, Powai, Mumbai 400076, India;  
basumallick.suhita16@gmail.com

<sup>2</sup> Laboratory of Structural and Computational Physical-Chemistry for Nanosciences and QSAR,  
Biology-Chemistry Department, Faculty of Chemistry, Biology, Geography, West University of Timisoara,  
Str. Pestalozzi No. 16, 300115 Timisoara, Romania

<sup>3</sup> Department of Chemical Sciences, Indian Institute of Science Education and Research Kolkata, Mohanpur,  
Nadia 741246, India

\* Correspondence: mihai.putz@e-uvr.ro (M.V.P.); s.pal@iiserkol.ac.in (S.P.);  
Tel.: +40-0256-592-631 (M.V.P.); +91-33-6136-0012 (S.P.)

A.1Di-Lithium Molecule ( $\text{Li}_2$ ): at internuclear distance 5.05 a.u

### Basis-A

|    |              |                 |        |        |
|----|--------------|-----------------|--------|--------|
| li | 3.0          | 0.0000          | 0.0000 | 0.0000 |
| S  | 8            |                 |        |        |
| 1  | 1469.0000000 | 0.000765601232  |        |        |
| 1  | 220.5000000  | 0.005888932715  |        |        |
| 1  | 50.2600000   | 0.029655553732  |        |        |
| 1  | 14.2400000   | 0.109123162563  |        |        |
| 1  | 4.5810000    | 0.282641784375  |        |        |
| 1  | 1.5800000    | 0.452887111102  |        |        |
| 1  | 0.5640000    | 0.274630956861  |        |        |
| 1  | 0.0734500    | 0.009745923779  |        |        |
| S  | 8            |                 |        |        |
| 2  | 1469.0000000 | -0.000224991961 |        |        |
| 2  | 220.5000000  | -0.001730563167 |        |        |
| 2  | 50.2600000   | -0.008791560880 |        |        |
| 2  | 14.2400000   | -0.033152565467 |        |        |
| 2  | 4.5810000    | -0.091687974012 |        |        |
| 2  | 1.5800000    | -0.180010443274 |        |        |

|    |              |             |                 |              |
|----|--------------|-------------|-----------------|--------------|
|    | 2            | 0.5640000   | -0.255703363785 |              |
|    | 2            | 0.0734500   | 1.078277723416  |              |
| S  | 1            |             |                 |              |
|    | 3            | 0.0280500   | 1.000000000000  |              |
| P  | 3            |             |                 |              |
|    | 4            | 1.5340000   | 0.038003981035  |              |
|    | 4            | 0.2749000   | 0.232032118583  |              |
|    | 4            | 0.0736200   | 0.834631408456  |              |
| P  | 1            |             |                 |              |
|    | 5            | 0.0240300   | 1.000000000000  |              |
| D  | 1            |             |                 |              |
|    | 6            | 0.1239000   | 1.000000000000  |              |
| li |              | 3.0         | 0.0000          | 0.0000       |
|    |              |             |                 | 5.0512375652 |
| S  | 8            |             |                 |              |
| 7  | 1469.0000000 |             | 0.000765601232  |              |
|    | 7            | 220.5000000 | 0.005888932715  |              |
|    | 7            | 50.2600000  | 0.02965553732   |              |
|    | 7            | 14.2400000  | 0.109123162563  |              |
|    | 7            | 4.5810000   | 0.282641784375  |              |
|    | 7            | 1.5800000   | 0.452887111102  |              |
|    | 7            | 0.5640000   | 0.274630956861  |              |
|    | 7            | 0.0734500   | 0.009745923779  |              |
| S  | 8            |             |                 |              |
| 8  | 1469.0000000 |             | -0.000224991961 |              |
|    | 8            | 220.5000000 | -0.001730563167 |              |
|    | 8            | 50.2600000  | -0.008791560880 |              |
|    | 8            | 14.2400000  | -0.033152565467 |              |
|    | 8            | 4.5810000   | -0.091687974012 |              |
|    | 8            | 1.5800000   | -0.180010443274 |              |
|    | 8            | 0.5640000   | -0.255703363785 |              |
|    | 8            | 0.0734500   | 1.078277723416  |              |
| S  | 1            |             |                 |              |
|    | 9            | 0.0280500   | 1.000000000000  |              |
| P  | 3            |             |                 |              |
|    | 10           | 1.5340000   | 0.038003981035  |              |
|    | 10           | 0.2749000   | 0.232032118583  |              |
|    | 10           | 0.0736200   | 0.834631408456  |              |
| P  | 1            |             |                 |              |
|    | 11           | 0.0240300   | 1.000000000000  |              |
| D  | 1            |             |                 |              |
|    | 12           | 0.1239000   | 1.000000000000  |              |

### Basis-B

|    |              |             |                |        |        |
|----|--------------|-------------|----------------|--------|--------|
| li |              | 3.0         | 0.0000         | 0.0000 | 0.0000 |
| S  | 8            |             |                |        |        |
| 1  | 1469.0000000 |             | 0.000765601232 |        |        |
|    | 1            | 220.5000000 | 0.005888932715 |        |        |

|    |              |                 |
|----|--------------|-----------------|
| 1  | 50.2600000   | 0.029655553732  |
| 1  | 14.2400000   | 0.109123162563  |
| 1  | 4.5810000    | 0.282641784375  |
| 1  | 1.5800000    | 0.452887111102  |
| 1  | 0.5640000    | 0.274630956861  |
| 1  | 0.0734500    | 0.009745923779  |
| S  | 8            |                 |
| 2  | 1469.0000000 | -0.000224991961 |
| 2  | 220.5000000  | -0.001730563167 |
| 2  | 50.2600000   | -0.008791560880 |
| 2  | 14.2400000   | -0.033152565467 |
| 2  | 4.5810000    | -0.091687974012 |
| 2  | 1.5800000    | -0.180010443274 |
| 2  | 0.5640000    | -0.255703363785 |
| 2  | 0.0734500    | 1.078277723416  |
| S  | 1            |                 |
| 3  | 0.0280500    | 1.000000000000  |
| S  | 1            |                 |
| 4  | 0.0074000    | 1.000000000000  |
| P  | 3            |                 |
| 5  | 1.5340000    | 0.038003981035  |
| 5  | 0.2749000    | 0.232032118583  |
| 5  | 0.0736200    | 0.834631408456  |
| P  | 1            |                 |
| 6  | 0.0240300    | 1.000000000000  |
| P  | 1            |                 |
| 7  | 0.0074000    | 1.000000000000  |
| D  | 1            |                 |
| 8  | 0.1239000    | 1.000000000000  |
| li | 3.0          | 0.0000          |
|    |              | 0.0000          |
|    |              | 5.0512375652    |
| S  | 8            |                 |
| 9  | 1469.0000000 | 0.000765601232  |
| 9  | 220.5000000  | 0.005888932715  |
| 9  | 50.2600000   | 0.029655553732  |
| 9  | 14.2400000   | 0.109123162563  |
| 9  | 4.5810000    | 0.282641784375  |
| 9  | 1.5800000    | 0.452887111102  |
| 9  | 0.5640000    | 0.274630956861  |
| 9  | 0.0734500    | 0.009745923779  |
| S  | 8            |                 |
| 10 | 1469.0000000 | -0.000224991961 |
| 10 | 220.5000000  | -0.001730563167 |
| 10 | 50.2600000   | -0.008791560880 |
| 10 | 14.2400000   | -0.033152565467 |
| 10 | 4.5810000    | -0.091687974012 |
| 10 | 1.5800000    | -0.180010443274 |
| 10 | 0.5640000    | -0.255703363785 |
| 10 | 0.0734500    | 1.078277723416  |
| S  | 1            |                 |
| 11 | 0.0280500    | 1.000000000000  |

|   |    |           |                |
|---|----|-----------|----------------|
| S | 1  |           |                |
|   | 12 | 0.0074000 | 1.000000000000 |
| P | 3  |           |                |
|   | 13 | 1.5340000 | 0.038003981035 |
|   | 13 | 0.2749000 | 0.232032118583 |
|   | 13 | 0.0736200 | 0.834631408456 |
| P | 1  |           |                |
|   | 14 | 0.0240300 | 1.000000000000 |
| P | 1  |           |                |
|   | 15 | 0.0074000 | 1.000000000000 |
| D | 1  |           |                |
|   | 16 | 0.1239000 | 1.000000000000 |

### Basis-C

|    |               |                 |                |        |
|----|---------------|-----------------|----------------|--------|
| li | 3.0           | 0.0000          | 0.0000         | 0.0000 |
| S  | 9             |                 |                |        |
| 1  | 5988.0000000  | 0.000133195806  |                |        |
|    | 1 898.9000000 | 0.001026509035  |                |        |
|    | 1 205.9000000 | 0.005279761591  |                |        |
|    | 1 59.2400000  | 0.020959812281  |                |        |
|    | 1 19.8700000  | 0.066437667674  |                |        |
|    | 1 7.4060000   | 0.166019058768  |                |        |
|    | 1 2.9300000   | 0.315501808091  |                |        |
|    | 1 1.1890000   | 0.394102355987  |                |        |
|    | 1 0.4798000   | 0.191151004356  |                |        |
| S  | 9             |                 |                |        |
| 2  | 5988.0000000  | -0.000077656259 |                |        |
|    | 2 898.9000000 | -0.000595364655 |                |        |
|    | 2 205.9000000 | -0.003032292029 |                |        |
|    | 2 59.2400000  | -0.012299272305 |                |        |
|    | 2 19.8700000  | -0.038898390070 |                |        |
|    | 2 7.4060000   | -0.103900377014 |                |        |
|    | 2 2.9300000   | -0.206846691413 |                |        |
|    | 2 1.1890000   | -0.366970200153 |                |        |
|    | 2 0.4798000   | -0.414865622550 |                |        |
| S  | 1             |                 |                |        |
|    | 3             | 0.0750900       | 1.000000000000 |        |
| S  | 1             |                 |                |        |
|    | 4             | 0.0283200       | 1.000000000000 |        |
| P  | 3             |                 |                |        |
|    | 5             | 3.2660000       | 0.035544688557 |        |
|    | 5             | 0.6511000       | 0.195796454763 |        |
|    | 5             | 0.1696000       | 0.863995412271 |        |
| P  | 1             |                 |                |        |
|    | 6             | 0.0557800       | 1.000000000000 |        |
| P  | 1             |                 |                |        |
|    | 7             | 0.0205000       | 1.000000000000 |        |
| D  | 1             |                 |                |        |
|    | 8             | 0.1239000       | 1.000000000000 |        |

|    |              |                 |                |              |
|----|--------------|-----------------|----------------|--------------|
| li | 3.0          | 0.0000          | 0.0000         | 5.0512375652 |
| S  | 9            |                 |                |              |
| 9  | 5988.0000000 |                 | 0.000133195806 |              |
| 9  | 898.9000000  |                 | 0.001026509035 |              |
| 9  | 205.9000000  |                 | 0.005279761591 |              |
| 9  | 59.2400000   |                 | 0.020959812281 |              |
| 9  | 19.8700000   |                 | 0.066437667674 |              |
| 9  | 7.4060000    |                 | 0.166019058768 |              |
| 9  | 2.9300000    |                 | 0.315501808091 |              |
| 9  | 1.1890000    |                 | 0.394102355987 |              |
| 9  | 0.4798000    |                 | 0.191151004356 |              |
| S  | 9            |                 |                |              |
| 10 | 5988.0000000 | -0.000077656259 |                |              |
| 10 | 898.9000000  | -0.000595364655 |                |              |
| 10 | 205.9000000  | -0.003032292029 |                |              |
| 10 | 59.2400000   | -0.012299272305 |                |              |
| 10 | 19.8700000   | -0.038898390070 |                |              |
| 10 | 7.4060000    | -0.103900377014 |                |              |
| 10 | 2.9300000    | -0.206846691413 |                |              |
| 10 | 1.1890000    | -0.366970200153 |                |              |
| 10 | 0.4798000    | -0.414865622550 |                |              |
| S  | 1            |                 |                |              |
| 11 | 0.0750900    | 1.000000000000  |                |              |
| S  | 1            |                 |                |              |
| 12 | 0.0283200    | 1.000000000000  |                |              |
| P  | 3            |                 |                |              |
| 13 | 3.2660000    | 0.035544688557  |                |              |
| 13 | 0.6511000    | 0.195796454763  |                |              |
| 13 | 0.1696000    | 0.863995412271  |                |              |
| P  | 1            |                 |                |              |
| 14 | 0.0557800    | 1.000000000000  |                |              |
| P  | 1            |                 |                |              |
| 15 | 0.0205000    | 1.000000000000  |                |              |
| D  | 1            |                 |                |              |
| 16 | 0.1239000    | 1.000000000000  |                |              |

### Basis-D

|    |              |                |        |        |
|----|--------------|----------------|--------|--------|
| li | 3.0          | 0.0000         | 0.0000 | 0.0000 |
| S  | 9            |                |        |        |
| 1  | 5988.0000000 | 0.000133195806 |        |        |
| 1  | 898.9000000  | 0.001026509035 |        |        |
| 1  | 205.9000000  | 0.005279761591 |        |        |
| 1  | 59.2400000   | 0.020959812281 |        |        |
| 1  | 19.8700000   | 0.066437667674 |        |        |
| 1  | 7.4060000    | 0.166019058768 |        |        |
| 1  | 2.9300000    | 0.315501808091 |        |        |
| 1  | 1.1890000    | 0.394102355987 |        |        |
| 1  | 0.4798000    | 0.191151004356 |        |        |

|    |              |        |                 |              |
|----|--------------|--------|-----------------|--------------|
| S  | 9            |        |                 |              |
| 2  | 5988.0000000 |        | -0.000077656259 |              |
| 2  | 898.9000000  |        | -0.000595364655 |              |
| 2  | 205.9000000  |        | -0.003032292029 |              |
| 2  | 59.2400000   |        | -0.012299272305 |              |
| 2  | 19.8700000   |        | -0.038898390070 |              |
| 2  | 7.4060000    |        | -0.103900377014 |              |
| 2  | 2.9300000    |        | -0.206846691413 |              |
| 2  | 1.1890000    |        | -0.366970200153 |              |
| 2  | 0.4798000    |        | -0.414865622550 |              |
| S  | 1            |        |                 |              |
| 3  | 0.0750900    |        | 1.000000000000  |              |
| S  | 1            |        |                 |              |
| 4  | 0.0283200    |        | 1.000000000000  |              |
| S  | 1            |        |                 |              |
| 5  | 0.0074000    |        | 1.000000000000  |              |
| P  | 3            |        |                 |              |
| 6  | 3.2660000    |        | 0.035544688557  |              |
| 6  | 0.6511000    |        | 0.195796454763  |              |
| 6  | 0.1696000    |        | 0.863995412271  |              |
| P  | 1            |        |                 |              |
| 7  | 0.0557800    |        | 1.000000000000  |              |
| P  | 1            |        |                 |              |
| 8  | 0.0205000    |        | 1.000000000000  |              |
| P  | 1            |        |                 |              |
| 9  | 0.0074000    |        | 1.000000000000  |              |
| D  | 1            |        |                 |              |
| 10 | 0.1239000    |        | 1.000000000000  |              |
| li | 3.0          | 0.0000 | 0.0000          | 5.0512375652 |
| S  | 9            |        |                 |              |
| 11 | 5988.0000000 |        | 0.000133195806  |              |
| 11 | 898.9000000  |        | 0.001026509035  |              |
| 11 | 205.9000000  |        | 0.005279761591  |              |
| 11 | 59.2400000   |        | 0.020959812281  |              |
| 11 | 19.8700000   |        | 0.066437667674  |              |
| 11 | 7.4060000    |        | 0.166019058768  |              |
| 11 | 2.9300000    |        | 0.315501808091  |              |
| 11 | 1.1890000    |        | 0.394102355987  |              |
| 11 | 0.4798000    |        | 0.191151004356  |              |
| S  | 9            |        |                 |              |
| 12 | 5988.0000000 |        | -0.000077656259 |              |
| 12 | 898.9000000  |        | -0.000595364655 |              |
| 12 | 205.9000000  |        | -0.003032292029 |              |
| 12 | 59.2400000   |        | -0.012299272305 |              |
| 10 | 19.8700000   |        | -0.038898390070 |              |
| 10 | 7.4060000    |        | -0.103900377014 |              |
| 10 | 2.9300000    |        | -0.206846691413 |              |
| 12 | 1.1890000    |        | -0.366970200153 |              |
| 12 | 0.4798000    |        | -0.414865622550 |              |
| S  | 1            |        |                 |              |

|   |    |           |                |
|---|----|-----------|----------------|
|   | 13 | 0.0750900 | 1.000000000000 |
| S | 1  |           |                |
|   | 14 | 0.0283200 | 1.000000000000 |
| S | 1  |           |                |
|   | 15 | 0.0074000 | 1.000000000000 |
| P | 3  |           |                |
|   | 16 | 3.2660000 | 0.035544688557 |
|   | 16 | 0.6511000 | 0.195796454763 |
|   | 16 | 0.1696000 | 0.863995412271 |
| P | 1  |           |                |
|   | 17 | 0.0557800 | 1.000000000000 |
| P | 1  |           |                |
|   | 18 | 0.0205000 | 1.000000000000 |
| P | 1  |           |                |
|   | 19 | 0.0074000 | 1.000000000000 |
| D | 1  |           |                |
|   | 20 | 0.1239000 | 1.000000000000 |

## A.2 Di-Lithium Molecule ( $\text{Li}_2$ ): at internuclear distance 6.0 a.u

### Basis-A

|    |              |                 |        |        |
|----|--------------|-----------------|--------|--------|
| li | 3.0          | 0.0000          | 0.0000 | 0.0000 |
| S  | 8            |                 |        |        |
| 1  | 1469.0000000 | 0.000765601232  |        |        |
| 1  | 220.5000000  | 0.005888932715  |        |        |
| 1  | 50.2600000   | 0.029655553732  |        |        |
| 1  | 14.2400000   | 0.109123162563  |        |        |
| 1  | 4.5810000    | 0.282641784375  |        |        |
| 1  | 1.5800000    | 0.452887111102  |        |        |
| 1  | 0.5640000    | 0.274630956861  |        |        |
| 1  | 0.0734500    | 0.009745923779  |        |        |
| S  | 8            |                 |        |        |
| 2  | 1469.0000000 | -0.000224991961 |        |        |
| 2  | 220.5000000  | -0.001730563167 |        |        |
| 2  | 50.2600000   | -0.008791560880 |        |        |
| 2  | 14.2400000   | -0.033152565467 |        |        |
| 2  | 4.5810000    | -0.091687974012 |        |        |
| 2  | 1.5800000    | -0.180010443274 |        |        |
| 2  | 0.5640000    | -0.255703363785 |        |        |
| 2  | 0.0734500    | 1.078277723416  |        |        |
| S  | 1            |                 |        |        |
| 3  | 0.0280500    | 1.000000000000  |        |        |
| P  | 3            |                 |        |        |

|    |              |                 |                 |        |
|----|--------------|-----------------|-----------------|--------|
|    | 4            | 1.5340000       | 0.038003981035  |        |
|    | 4            | 0.2749000       | 0.232032118583  |        |
|    | 4            | 0.0736200       | 0.834631408456  |        |
| P  | 1            |                 |                 |        |
|    | 5            | 0.0240300       | 1.000000000000  |        |
| D  | 1            |                 |                 |        |
|    | 6            | 0.1239000       | 1.000000000000  |        |
| li | 3.0          | 0.0000          | 0.0000          | 6.0000 |
| S  | 8            |                 |                 |        |
| 7  | 1469.0000000 | 0.000765601232  |                 |        |
|    | 7            | 220.5000000     | 0.005888932715  |        |
|    | 7            | 50.2600000      | 0.02965553732   |        |
|    | 7            | 14.2400000      | 0.109123162563  |        |
|    | 7            | 4.5810000       | 0.282641784375  |        |
|    | 7            | 1.5800000       | 0.452887111102  |        |
|    | 7            | 0.5640000       | 0.274630956861  |        |
|    | 7            | 0.0734500       | 0.009745923779  |        |
| S  | 8            |                 |                 |        |
| 8  | 1469.0000000 | -0.000224991961 |                 |        |
|    | 8            | 220.5000000     | -0.001730563167 |        |
|    | 8            | 50.2600000      | -0.008791560880 |        |
|    | 8            | 14.2400000      | -0.033152565467 |        |
|    | 8            | 4.5810000       | -0.091687974012 |        |
|    | 8            | 1.5800000       | -0.180010443274 |        |
|    | 8            | 0.5640000       | -0.255703363785 |        |
|    | 8            | 0.0734500       | 1.078277723416  |        |
| S  | 1            |                 |                 |        |
|    | 9            | 0.0280500       | 1.000000000000  |        |
| P  | 3            |                 |                 |        |
|    | 10           | 1.5340000       | 0.038003981035  |        |
|    | 10           | 0.2749000       | 0.232032118583  |        |
|    | 10           | 0.0736200       | 0.834631408456  |        |
| P  | 1            |                 |                 |        |
|    | 11           | 0.0240300       | 1.000000000000  |        |
| D  | 1            |                 |                 |        |
|    | 12           | 0.1239000       | 1.000000000000  |        |

### Basis-B

|    |              |                |                |        |
|----|--------------|----------------|----------------|--------|
| li | 3.0          | 0.0000         | 0.0000         | 0.0000 |
| S  | 8            |                |                |        |
| 1  | 1469.0000000 | 0.000765601232 |                |        |
|    | 1            | 220.5000000    | 0.005888932715 |        |
|    | 1            | 50.2600000     | 0.02965553732  |        |
|    | 1            | 14.2400000     | 0.109123162563 |        |
|    | 1            | 4.5810000      | 0.282641784375 |        |
|    | 1            | 1.5800000      | 0.452887111102 |        |
|    | 1            | 0.5640000      | 0.274630956861 |        |
|    | 1            | 0.0734500      | 0.009745923779 |        |



|    |              |             |                 |        |
|----|--------------|-------------|-----------------|--------|
| S  | 8            |             |                 |        |
| 2  | 1469.0000000 |             | -0.000224991961 |        |
|    | 2            | 220.5000000 | -0.001730563167 |        |
|    | 2            | 50.2600000  | -0.008791560880 |        |
|    | 2            | 14.2400000  | -0.033152565467 |        |
|    | 2            | 4.5810000   | -0.091687974012 |        |
|    | 2            | 1.5800000   | -0.180010443274 |        |
|    | 2            | 0.5640000   | -0.255703363785 |        |
|    | 2            | 0.0734500   | 1.078277723416  |        |
| S  | 1            |             |                 |        |
|    | 3            | 0.0280500   | 1.000000000000  |        |
| S  | 1            |             |                 |        |
|    | 4            | 0.0074000   | 1.000000000000  |        |
| P  | 3            |             |                 |        |
|    | 5            | 1.5340000   | 0.038003981035  |        |
|    | 5            | 0.2749000   | 0.232032118583  |        |
|    | 5            | 0.0736200   | 0.834631408456  |        |
| P  | 1            |             |                 |        |
|    | 6            | 0.0240300   | 1.000000000000  |        |
| P  | 1            |             |                 |        |
|    | 7            | 0.0074000   | 1.000000000000  |        |
| D  | 1            |             |                 |        |
|    | 8            | 0.1239000   | 1.000000000000  |        |
| li | 3.0          | 0.0000      | 0.0000          | 6.0000 |
| S  | 8            |             |                 |        |
| 9  | 1469.0000000 |             | 0.000765601232  |        |
|    | 9            | 220.5000000 | 0.005888932715  |        |
|    | 9            | 50.2600000  | 0.029655553732  |        |
|    | 9            | 14.2400000  | 0.109123162563  |        |
|    | 9            | 4.5810000   | 0.282641784375  |        |
|    | 9            | 1.5800000   | 0.452887111102  |        |
|    | 9            | 0.5640000   | 0.274630956861  |        |
|    | 9            | 0.0734500   | 0.009745923779  |        |
| S  | 8            |             |                 |        |
| 10 | 1469.0000000 |             | -0.000224991961 |        |
|    | 10           | 220.5000000 | -0.001730563167 |        |
|    | 10           | 50.2600000  | -0.008791560880 |        |
|    | 10           | 14.2400000  | -0.033152565467 |        |
|    | 10           | 4.5810000   | -0.091687974012 |        |
|    | 10           | 1.5800000   | -0.180010443274 |        |
|    | 10           | 0.5640000   | -0.255703363785 |        |
|    | 10           | 0.0734500   | 1.078277723416  |        |
| S  | 1            |             |                 |        |
|    | 11           | 0.0280500   | 1.000000000000  |        |
| S  | 1            |             |                 |        |
|    | 12           | 0.0074000   | 1.000000000000  |        |
| P  | 3            |             |                 |        |
|    | 13           | 1.5340000   | 0.038003981035  |        |
|    | 13           | 0.2749000   | 0.232032118583  |        |
|    | 13           | 0.0736200   | 0.834631408456  |        |

|   |    |           |                  |
|---|----|-----------|------------------|
| P | 1  |           |                  |
|   | 14 | 0.0240300 | 1.00000000000000 |
| P | 1  |           |                  |
|   | 15 | 0.0074000 | 1.00000000000000 |
| D | 1  |           |                  |
|   | 16 | 0.1239000 | 1.00000000000000 |

# Basis-C

|    |     |        |        |        |
|----|-----|--------|--------|--------|
| li | 3.0 | 0.0000 | 0.0000 | 0.0000 |
|----|-----|--------|--------|--------|

|   |              |                |  |
|---|--------------|----------------|--|
| S | 9            |                |  |
| 1 | 5988.0000000 | 0.000133195806 |  |
| 1 | 898.9000000  | 0.001026509035 |  |
| 1 | 205.9000000  | 0.005279761591 |  |
| 1 | 59.2400000   | 0.020959812281 |  |
| 1 | 19.8700000   | 0.066437667674 |  |
| 1 | 7.4060000    | 0.166019058768 |  |
| 1 | 2.9300000    | 0.315501808091 |  |
| 1 | 1.1890000    | 0.394102355987 |  |
| 1 | 0.4798000    | 0.191151004356 |  |

|   |              |                 |  |
|---|--------------|-----------------|--|
| S | 9            |                 |  |
| 2 | 5988.0000000 | -0.000077656259 |  |
| 2 | 898.9000000  | -0.000595364655 |  |
| 2 | 205.9000000  | -0.003032292029 |  |
| 2 | 59.2400000   | -0.012299272305 |  |
| 2 | 19.8700000   | -0.038898390070 |  |
| 2 | 7.4060000    | -0.103900377014 |  |
| 2 | 2.9300000    | -0.206846691413 |  |
| 2 | 1.1890000    | -0.366970200153 |  |
| 2 | 0.4798000    | -0.414865622550 |  |

|   |           |                  |  |
|---|-----------|------------------|--|
| S | 1         |                  |  |
| 3 | 0.0750900 | 1.00000000000000 |  |

|   |           |                  |  |
|---|-----------|------------------|--|
| S | 1         |                  |  |
| 4 | 0.0283200 | 1.00000000000000 |  |

|   |           |                |  |
|---|-----------|----------------|--|
| P | 3         |                |  |
| 5 | 3.2660000 | 0.035544688557 |  |
| 5 | 0.6511000 | 0.195796454763 |  |
| 5 | 0.1696000 | 0.863995412271 |  |

|   |           |                  |  |
|---|-----------|------------------|--|
| P | 1         |                  |  |
| 6 | 0.0557800 | 1.00000000000000 |  |

|   |           |                  |  |
|---|-----------|------------------|--|
| P | 1         |                  |  |
| 7 | 0.0205000 | 1.00000000000000 |  |

|   |           |                  |  |
|---|-----------|------------------|--|
| D | 1         |                  |  |
| 8 | 0.1239000 | 1.00000000000000 |  |

|    |     |        |        |        |
|----|-----|--------|--------|--------|
| li | 3.0 | 0.0000 | 0.0000 | 6.0000 |
|----|-----|--------|--------|--------|

|   |              |                |  |
|---|--------------|----------------|--|
| S | 9            |                |  |
| 9 | 5988.0000000 | 0.000133195806 |  |
| 9 | 898.9000000  | 0.001026509035 |  |
| 9 | 205.9000000  | 0.005279761591 |  |

|    |              |                 |
|----|--------------|-----------------|
| 9  | 59.2400000   | 0.020959812281  |
| 9  | 19.8700000   | 0.066437667674  |
| 9  | 7.4060000    | 0.166019058768  |
| 9  | 2.9300000    | 0.315501808091  |
| 9  | 1.1890000    | 0.394102355987  |
| 9  | 0.4798000    | 0.191151004356  |
| S  | 9            |                 |
| 10 | 5988.0000000 | -0.000077656259 |
| 10 | 898.9000000  | -0.000595364655 |
| 10 | 205.9000000  | -0.003032292029 |
| 10 | 59.2400000   | -0.012299272305 |
| 10 | 19.8700000   | -0.038898390070 |
| 10 | 7.4060000    | -0.103900377014 |
| 10 | 2.9300000    | -0.206846691413 |
| 10 | 1.1890000    | -0.366970200153 |
| 10 | 0.4798000    | -0.414865622550 |
| S  | 1            |                 |
| 11 | 0.0750900    | 1.000000000000  |
| S  | 1            |                 |
| 12 | 0.0283200    | 1.000000000000  |
| P  | 3            |                 |
| 13 | 3.2660000    | 0.035544688557  |
| 13 | 0.6511000    | 0.195796454763  |
| 13 | 0.1696000    | 0.863995412271  |
| P  | 1            |                 |
| 14 | 0.0557800    | 1.000000000000  |
| P  | 1            |                 |
| 15 | 0.0205000    | 1.000000000000  |
| D  | 1            |                 |
| 16 | 0.1239000    | 1.000000000000  |

# Basis-D

|    |              |                 |        |        |
|----|--------------|-----------------|--------|--------|
| li | 3.0          | 0.0000          | 0.0000 | 0.0000 |
| S  | 9            |                 |        |        |
| 1  | 5988.0000000 | 0.000133195806  |        |        |
| 1  | 898.9000000  | 0.001026509035  |        |        |
| 1  | 205.9000000  | 0.005279761591  |        |        |
| 1  | 59.2400000   | 0.020959812281  |        |        |
| 1  | 19.8700000   | 0.066437667674  |        |        |
| 1  | 7.4060000    | 0.166019058768  |        |        |
| 1  | 2.9300000    | 0.315501808091  |        |        |
| 1  | 1.1890000    | 0.394102355987  |        |        |
| 1  | 0.4798000    | 0.191151004356  |        |        |
| S  | 9            |                 |        |        |
| 2  | 5988.0000000 | -0.000077656259 |        |        |
| 2  | 898.9000000  | -0.000595364655 |        |        |
| 2  | 205.9000000  | -0.003032292029 |        |        |
| 2  | 59.2400000   | -0.012299272305 |        |        |
| 2  | 19.8700000   | -0.038898390070 |        |        |

|    |    |              |                 |        |
|----|----|--------------|-----------------|--------|
|    | 2  | 7.4060000    | -0.103900377014 |        |
|    | 2  | 2.9300000    | -0.206846691413 |        |
|    | 2  | 1.1890000    | -0.366970200153 |        |
|    | 2  | 0.4798000    | -0.414865622550 |        |
| S  | 1  |              |                 |        |
|    | 3  | 0.0750900    | 1.000000000000  |        |
| S  | 1  |              |                 |        |
|    | 4  | 0.0283200    | 1.000000000000  |        |
| S  | 1  |              |                 |        |
|    | 5  | 0.0074000    | 1.000000000000  |        |
| P  | 3  |              |                 |        |
|    | 6  | 3.2660000    | 0.035544688557  |        |
|    | 6  | 0.6511000    | 0.195796454763  |        |
|    | 6  | 0.1696000    | 0.863995412271  |        |
| P  | 1  |              |                 |        |
|    | 7  | 0.0557800    | 1.000000000000  |        |
| P  | 1  |              |                 |        |
|    | 8  | 0.0205000    | 1.000000000000  |        |
| P  | 1  |              |                 |        |
|    | 9  | 0.0074000    | 1.000000000000  |        |
| D  | 1  |              |                 |        |
|    | 10 | 0.1239000    | 1.000000000000  |        |
| li |    | 3.0          | 0.0000          | 0.0000 |
| S  | 9  |              |                 | 6.0000 |
|    | 11 | 5988.0000000 | 0.000133195806  |        |
|    | 11 | 898.9000000  | 0.001026509035  |        |
|    | 11 | 205.9000000  | 0.005279761591  |        |
|    | 11 | 59.2400000   | 0.020959812281  |        |
|    | 11 | 19.8700000   | 0.066437667674  |        |
|    | 11 | 7.4060000    | 0.166019058768  |        |
|    | 11 | 2.9300000    | 0.315501808091  |        |
|    | 11 | 1.1890000    | 0.394102355987  |        |
|    | 11 | 0.4798000    | 0.191151004356  |        |
| S  | 9  |              |                 |        |
| 12 |    | 5988.0000000 | -0.000077656259 |        |
|    | 12 | 898.9000000  | -0.000595364655 |        |
|    | 12 | 205.9000000  | -0.003032292029 |        |
|    | 12 | 59.2400000   | -0.012299272305 |        |
|    | 10 | 19.8700000   | -0.038898390070 |        |
|    | 10 | 7.4060000    | -0.103900377014 |        |
|    | 10 | 2.9300000    | -0.206846691413 |        |
|    | 12 | 1.1890000    | -0.366970200153 |        |
|    | 12 | 0.4798000    | -0.414865622550 |        |
| S  | 1  |              |                 |        |
|    | 13 | 0.0750900    | 1.000000000000  |        |
| S  | 1  |              |                 |        |
|    | 14 | 0.0283200    | 1.000000000000  |        |
| S  | 1  |              |                 |        |
|    | 15 | 0.0074000    | 1.000000000000  |        |
| P  | 3  |              |                 |        |

|   |    |           |                |
|---|----|-----------|----------------|
|   | 16 | 3.2660000 | 0.035544688557 |
|   | 16 | 0.6511000 | 0.195796454763 |
|   | 16 | 0.1696000 | 0.863995412271 |
| P | 1  |           |                |
|   | 17 | 0.0557800 | 1.000000000000 |
| P | 1  |           |                |
|   | 18 | 0.0205000 | 1.000000000000 |
| P | 1  |           |                |
|   | 19 | 0.0074000 | 1.000000000000 |
| D | 1  |           |                |
|   | 20 | 0.1239000 | 1.000000000000 |
